# Supplementary material for: WGA-M001, a Mixture of Total Extracts of Tagetes erecta and Ocimum basilicum, Synergistically Alleviates Cartilage Destruction by Inhibiting ERK and NF-κB Signaling
Source: MDPI journal article supplement (doi:10.3390/ijms242417459), 2023-12-14
Supplement: s1 [file s1]

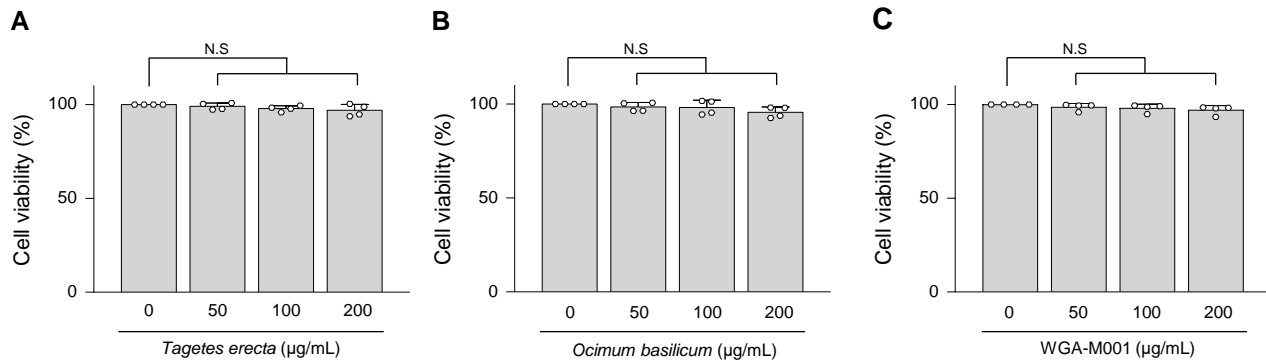

Figure S1. Toxicity of *Tagetes erecta* (A), *Ocimum basilicum* (B), and WGA-M001 (C) to chondrocytes. Cell viability was measured at various concentrations for 24 h and analyzed using a lactate dehydrogenase (LDH) assay. Data were analyzed using one-way analysis of variance with Bonferroni's test, and the plotted values are indicated as means  $\pm$  standard error of the mean.

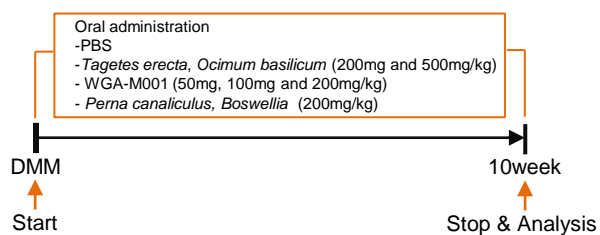

Figure S2. Oral administration plan for analysis of DMM-induced arthritis. Mice were administered phosphate-buffered saline (PBS) or indicated substances every day after DMM surgery until analysis.
